# Supplementary material for: A smart and rapid colorimetric method for the detection of codeine sulphate, using unmodified gold nanoprobe
Source: Royal Society of Chemistry journal article supplement (doi:10.1039/c4ra06269h), 2014-01-01
Supplement: c4ra06269h1.pdf [file c4ra06269h1.pdf]

## A smart and rapid colorimetric method for detection of codeine sulphate, using unmodified gold nanoprobe

Anand Lodha<sup>a</sup>, Alok Pandya<sup>b</sup>, Pinkesh Sutariya<sup>c</sup> and Shobhana K.Menon<sup>ac\*</sup>

<sup>a</sup>Department of Forensic Science, School of Sciences, Gujarat University, Ahmedabad, Gujarat-380009, INDIA

<sup>b</sup>Institute of life sciences, Ahmedabad University, Ahmedabad, Gujarat-380009, INDIA

<sup>c</sup>Department of Chemistry, School of Sciences, Gujarat University, Ahmedabad, Gujarat-380009, INDIA

E-mail: [shobhanamenon07@gmail.com](mailto:shobhanamenon07@gmail.com), [forensicwithanand@gmail.com](mailto:forensicwithanand@gmail.com)

### Materials and methods:

All chemicals used were of analytical grade or of the highest purity available. Each solution was prepared in double-distilled water. All glassware was thoroughly cleaned with freshly prepared 3:1 HCl/HNO<sub>3</sub> (aqua regia) and rinsed thoroughly with Milli-Q water prior to use. HAuCl<sub>4</sub> was purchased from Sigma-Aldrich. Drug standards codeine sulphate, morphine, phenylephrine, phenobarbital, diazepam and lorazepam were obtained in powder form which were dissolved in deionized double distilled water as per requirement. The stock solution of codeine sulphate (0.01 M) was prepared by dissolving 0.69681 g codeine sulphate in 100 ml deionized water and was diluted to 1 mM, 500 μM, 100 μM, 80 μM, 60 μM, 40 μM, 20 μM, 10 μM, 9 μM, 8 μM, 7 μM, 6 μM, 5 μM, 4 μM, 3 μM, 2 μM, 1 μM, and 0.1 μM and was detected by a 0.07 mM solution of AuNPs. To study the effect of pH, 0.025M potassium dihydrogen orthophosphate (KH<sub>2</sub>PO<sub>4</sub>) buffer solution was added into 0.2% orthophosphoric acid to get a pH from 3.5 to 7.5 and to make basic pH, 0.025 M potassium dihydrogen orthophosphate (KH<sub>2</sub>PO<sub>4</sub>) buffer solution was added into 0.2% Na<sub>2</sub>CO<sub>3</sub> to maintain the pH (8–12). UV–Vis absorption spectra was acquired on a Jasco V-570 UV–Vis spectrophotometer, IR spectra was recorded with a Bruker Tensor 27 FT-IR spectrometer, Transmission electron micrograph (TEM) was recorded by JEOL, JEM-2100 (200kV), DLS measurements were done using Nanotracs instrument and ESI Mass spectra were taken on a Shimadzu GCMS-QP 2000 A.

### Synthesis of citrate modified AuNP:

The AuNPs synthesis procedure was essentially the same as that developed by Menon et al<sup>15</sup>. The synthesis was carried out in a modified CEM Discover microwave using single mode with continuous power at 2.45GHz. The reactions were carried out in a sealed reaction vessel containing 3ml of 0.4 mM HAuCl<sub>4</sub> solution and 2 mL of 13 mM sodium citrate. This mixture was heated at 75°C at a power up to 300 W for 4 min. The color of solution changed from pale yellow to burgundy to yield Au nanoparticles of ~44 nm. Typically, 10 mL of 0.40 mM AuNPs suspensions was diluted to 60 mL as 0.07 mM stock solution.

### Animals used for drug administration:

The animals used were housed at the Animal Care Facility of Department of Zoology, Gujarat University. The Experimental Animals, Adult male Wistar rats (*Rattus norvegicus*) and Albino mice (*Mus musculus*) of Swiss strain, weighing

between 250-350 g & 25-45 g respectively were procured from Zydus-Cadila Health Care, Ahmedabad under the Animal Maintenance and Registration No. 167/1999/CPCSEA from the Ministry of Social Justice and Empowerment, Govt. of India. Upon arrival at the animal care facility, the animals were given 7-15 days to acclimatize to their conditions. The animals were housed under standard temperature ( $26\pm 2^{\circ}\text{C}$ ), operating on a 12 h dark/light condition and relative humidity of 30-70%. Animals of experiment were caged separately and maximum of two rat per cage and five mice per cage were maintained on a standard animal food obtained from Pranav Agro Industries, containing wheat - 70%, gram - 20%, fish meat - 5% and yeast powder - 5% and distilled water was given *ad libitum*. Adult Mice and adult rats received oral dose of codeine sulphate in water at the maximum tolerated acute and chronic doses. Adult male Wistar rats (*Rattus norvegicus*) and Albino mice were given 400 mg/kg and 350 mg/kg acute dose of codeine sulphate respectively and sacrificed under light ether anaesthesia. The delay periods between drug administration and killing were chosen on the basis of the half-life of codeine sulphate as per respective animal and its weight. For chronic dose, adult Wistar rats (*Rattus norvegicus*) and Albino mice (*Mus musculus*) received the codeine sulphate dose on the basis of their weight for 7 days in increasing order started with half dose of LD50 and then sacrificed animal was buried in sterile and non-sterile soil.

### **Marrow Preparation**

The bone marrows were isolated from the bone of the drug administrated animals after the formation of skeletal remain of animal body. Then it weighed 1g and dissolved in 5 mL 0.225 M NaOH with ultra-sonication.

### **Bone Preparation**

After the transformation of animal body to skeletal remains the remaining bone samples were collected. To remove the tissues and other soil debris adhering to the surface of the bones, it was soaked under hot alkaline water (0.1M NaOH around  $90^{\circ}\text{C}$ ) for 2 h and then it was scraped with a scalpel.

### **Soil preparation**

Soil samples were collected from bottom of the grave by spatula and stored at room temperature in airtight container after the air dry.

### **Extraction from marrow:**

Added saturated NaOH to maintain between 8–9 pH range and extracted with a mixture of 20 ml  $\text{CH}_2\text{Cl}_2$ -Isopropanol (9:1 v/v). The organic phase was filtered through anhydrous sodium sulphate, washed with organic phase. The solvent was immediately evaporated to dryness under stream of  $\text{N}_2$ . Bone marrow contains the high amount of lipids and fat that may interfere in process. To prevail over this problem, it is re-extracted with 5 ml of 0.5 M HCl. The organic phase was discarded and maintained the pH between 8.5-9 and evaporated to dryness.

**Extraction from Bone:**

The bone pieces were cleaned from muscle tissues and grounded in mortar. 10 ml of 2 M HNO<sub>3</sub> was added to 1 g of bone powder and the mixtures were demineralized at room temperature (37°C), overnight. Then it was extracted for the drug as described above, maintains the pH between 8.5-9 with NaOH.

**Extraction from Soil**

Added 10 ml of 1 M HCl in 1g of soil and incubated at room temperature (37°C), overnight. After the incubation period it was filtered out and discarded the soil debris, taken out the filtrate for further process. Added the saturated NaOH solution in the filtrate to maintain the pH between 8.5-9 and then was extracted by a mixture of hexane:ethanol (7:3 v/v) and hexane layer is discarded. The remaining ethanol-water layer is re-extracted by hexane:ethanol (7:3 v/v). The remaining ethanol-water layer was evaporated to dryness for further examination.

**Fig.S1**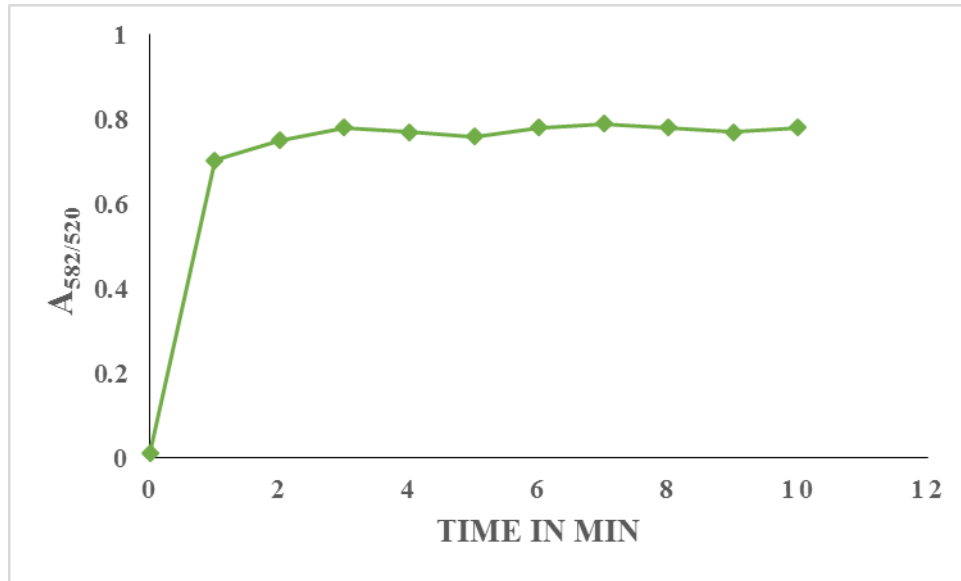

Fig S1 shows the response behaviour after addition of 0.1 mM codeine sulphate in 0.07 mM AuNp

**Fig.S2**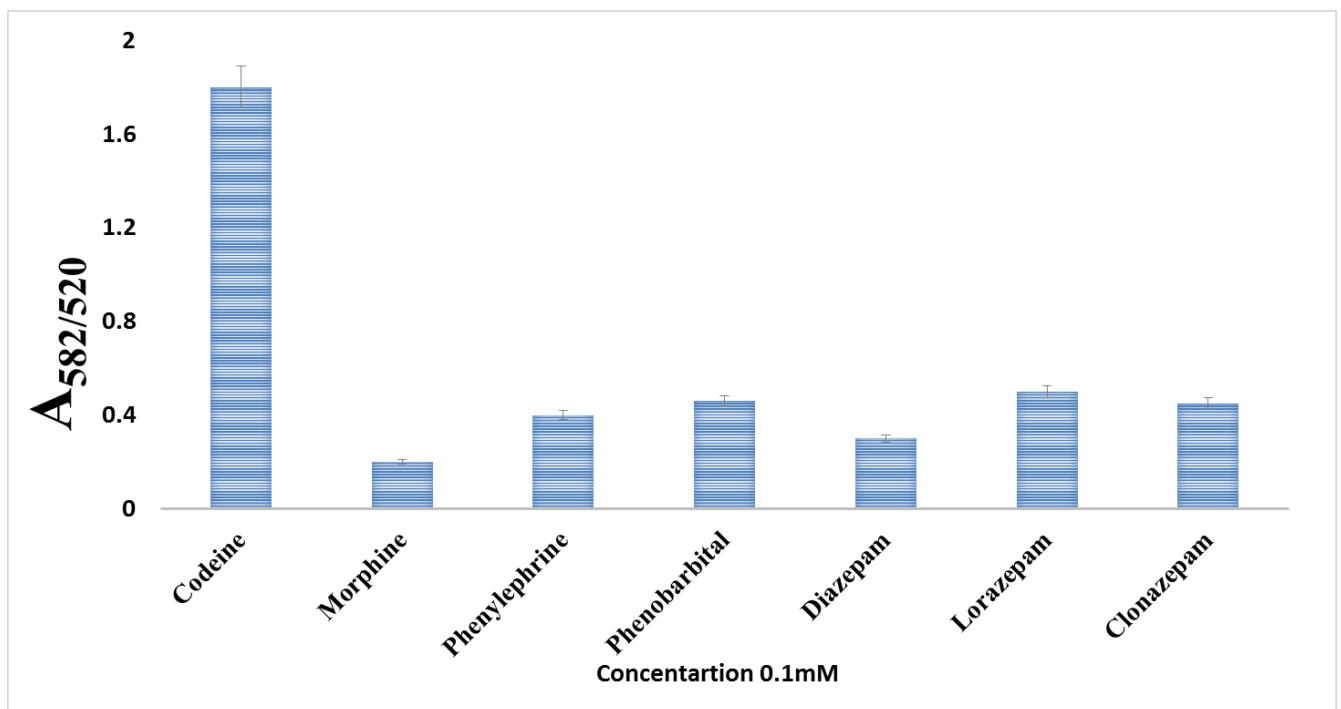

**Fig. S2** The relative absorbance change of AuNPs at 520 nm in the presence of 0.1 mM codeine sulphate, morphine, phynylphrine, phenobarbital, diazepam, lorazepam and clonazepam.

Fig.S3

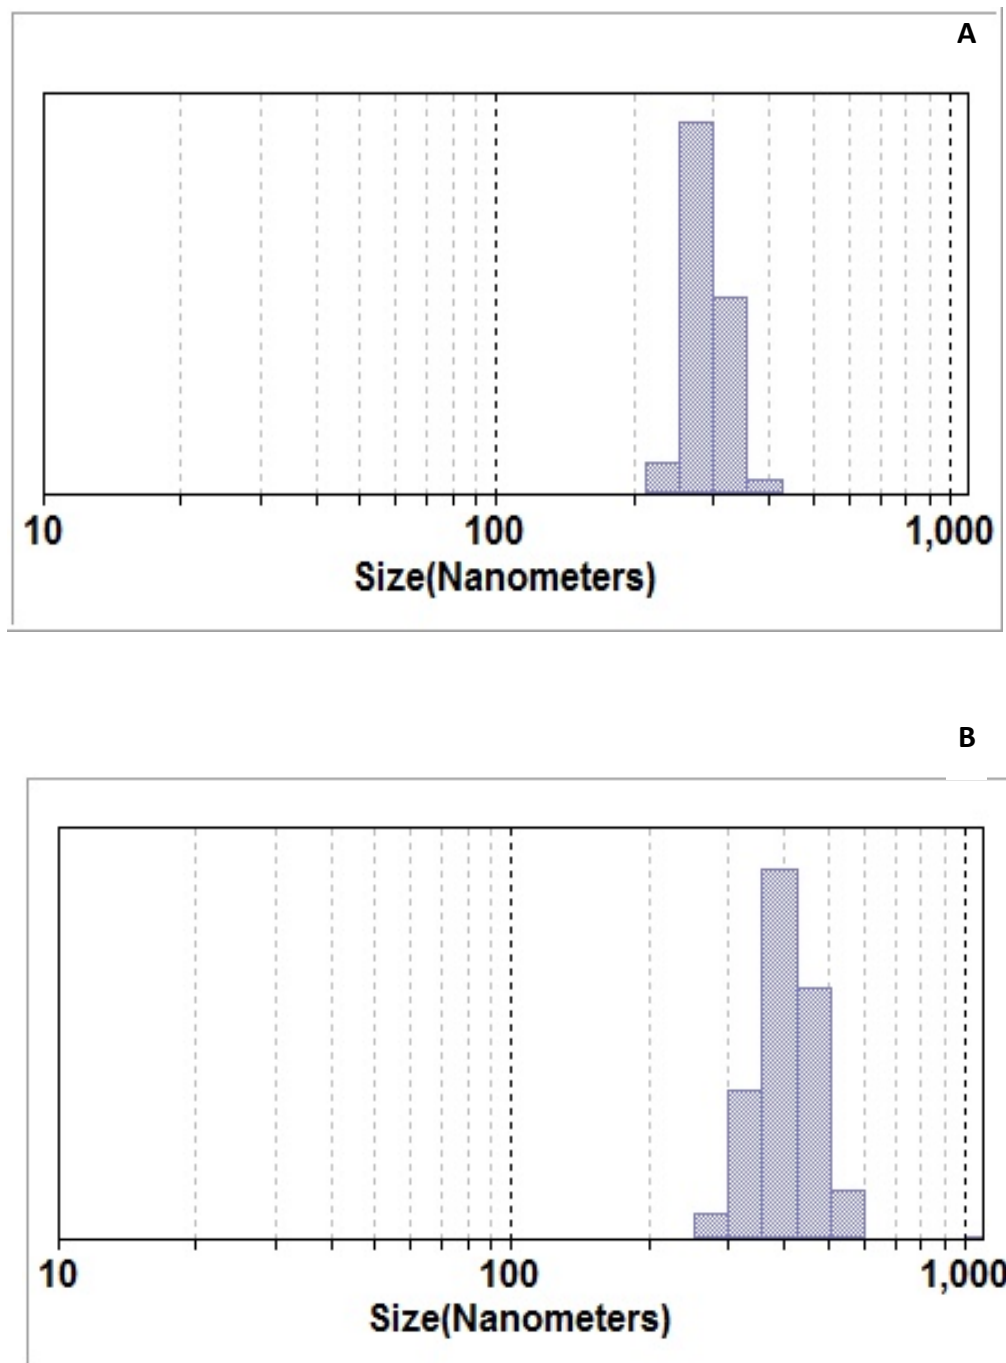

**Fig S3** Size distribution of AuNPs measured by DLS (A) In the presence of 1  $\mu\text{M}$  codeine sulphate (B) in the presence of 10  $\mu\text{M}$  codeine sulphate

Fig.S4

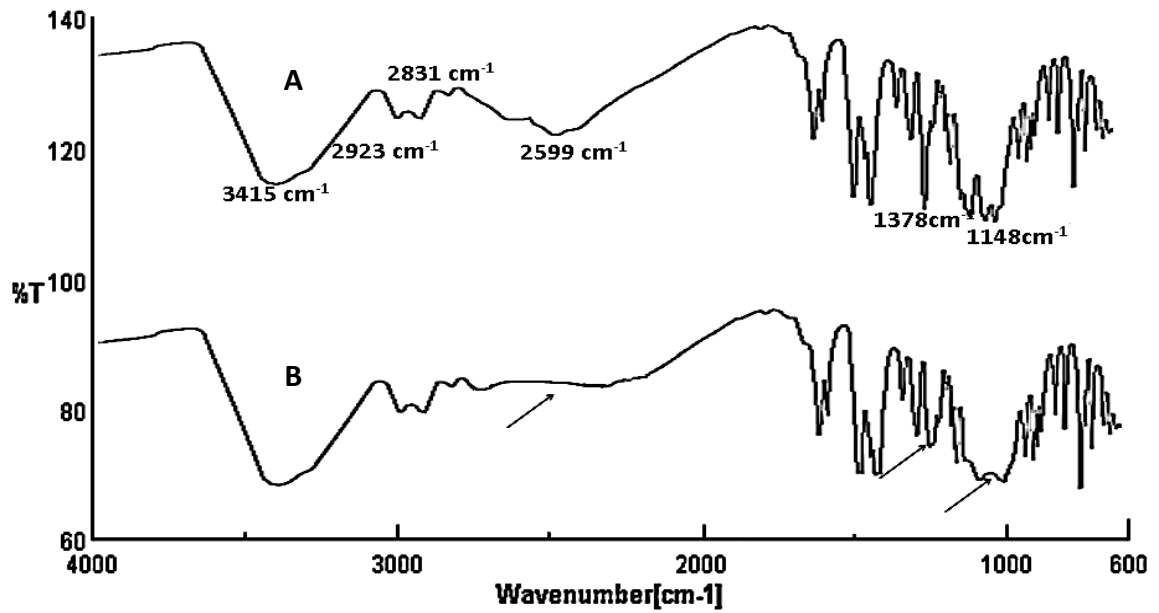

Fig.S4 Transmission IR spectra of (A) codeine sulphate (B) AuNPs-Cod complex formation

Fig.S5

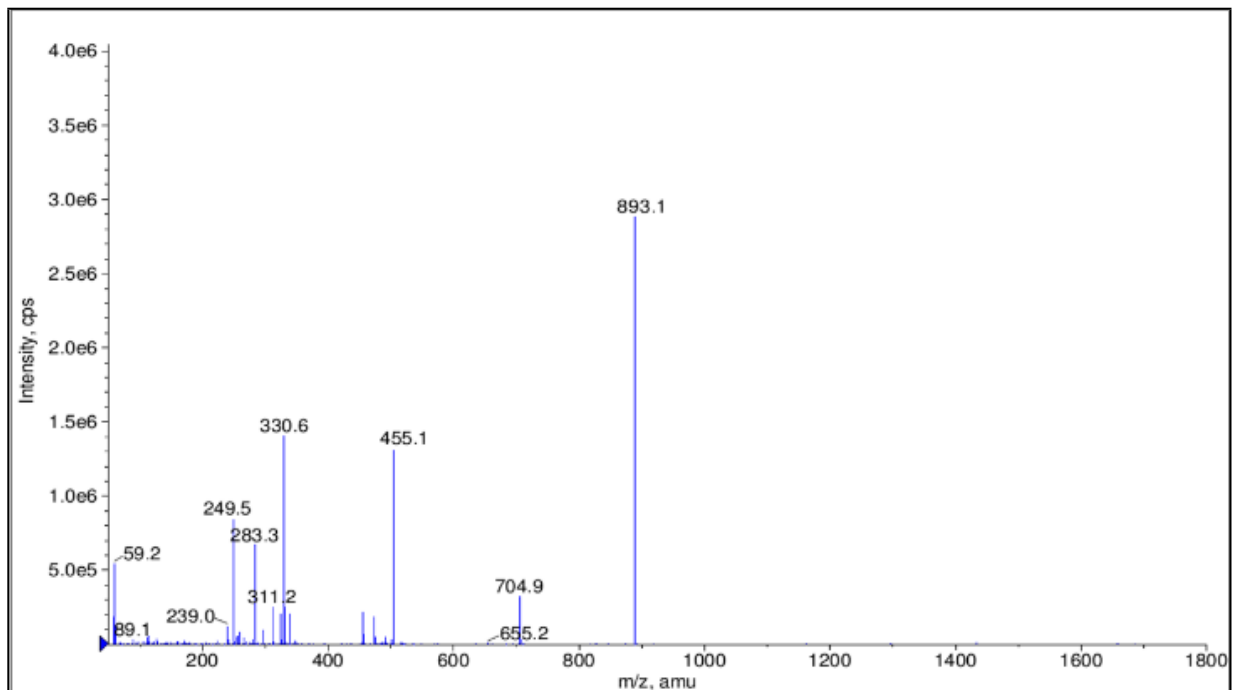

Fig. S5 ESI Mass spectra of AuNPs and after addition of codeine sulphate

**Fig.S6**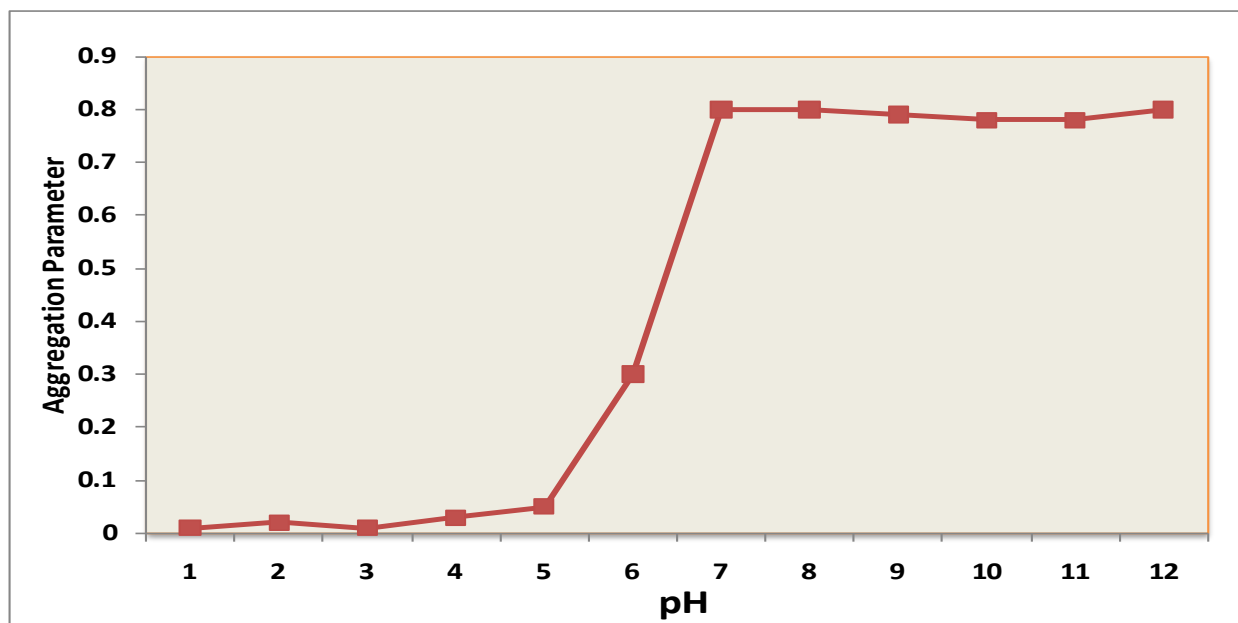

**Fig.S6** Shows the plot after addition of codeine sulphate concentration into the AuNPs at different pH

**Table S1**

| Parameter | Linear range ( $\mu\text{M}$ ) | Calibration equation    | Linearity ( $R^2$ ) |
|-----------|--------------------------------|-------------------------|---------------------|
| Red       | 1-10                           | $y = -3.107x + 98.74$   | $R^2 = 0.9905$      |
| Green     | 1-10                           | $y = -4.314x + 106.95$  | $R^2 = 0.9945$      |
| Blue      | 1-10                           | $y = -4.0016x + 108.03$ | $R^2 = 0.9932$      |
| RGB       | 1-10                           | $y = -3.8075x + 104.57$ | $R^2 = 0.9994$      |

**Table S1** Linear ranges and calibration equations of methods using iPhone 5S for capture product images.

**Table S2**

| Solution of pH     | 2   | 4  | 6     | 8      | 10     |
|--------------------|-----|----|-------|--------|--------|
| Stability of AuNPs | 2 h | 4h | Weeks | Months | Months |

**Table S2** Stability of 0.07 mM citrate capped AuNPs at different pH conditions

**Table S3**

| Samples     | Added( $\mu\text{M}$ ) | Found( $\mu\text{M}$ ) | Recovery (%) | RSD(n=3) |
|-------------|------------------------|------------------------|--------------|----------|
| Bone        | 0                      | 1.3                    | -            | 1.21     |
|             | 10                     | 10.9                   | 96.4         | 0.98     |
|             | 50                     | 48.7                   | 94.9         | 0.97     |
| Bone marrow | 0                      | 15.4                   | -            | 1.34     |
|             | 10                     | 25.1                   | 98.8         | 1.42     |
|             | 50                     | 64.6                   | 98.7         | 1.22     |
| Soil        | 0                      | 11.3                   | -            | 1.53     |
|             | 10                     | 20.4                   | 95.7         | 1.01     |
|             | 50                     | 62.8                   | 102.4        | 1.14     |

**Table S3** Results of determination of codeine sulphate in bone, bone marrow and soil**Table S4**

| Sr. No | Method                                                                     | Sample                                 | Lower detection limit | Reference       |
|--------|----------------------------------------------------------------------------|----------------------------------------|-----------------------|-----------------|
| 1.     | Aptamer based Electrochemical Au-mesoporous silica nanoparticles biosensor | PBS Buffer                             | 3 pM                  | 18 <sup>a</sup> |
| 2.     | Citrate modified Gold Nanoparticles                                        | PBS buffer, Bone, Bone marrow and Soil | 0.9 $\mu\text{M}$     | Present method  |
| 3.     | Cyclic electrochemical voltammetry-RNA aptamer                             | PBS Buffer                             | 1.0 $\mu\text{M}$     | 18 <sup>b</sup> |
| 4.     | Device Oratect <sup>®</sup> III                                            | Blood                                  | 1.67 $\mu\text{M}$    | 18 <sup>c</sup> |

**Table S4** Comparison of present method with other methods
